# Supplementary material for: Konjac glucomannan-assisted curcumin alleviated dextran sulfate sodium-induced mice colitis via regulating immune response and maintaining intestinal barrier integrity
Source: Royal Society of Chemistry journal article supplement (doi:10.1039/d3fo01068f), 2023-01-01
Supplement: d3fo01068f1.pdf [file d3fo01068f1.pdf]

A

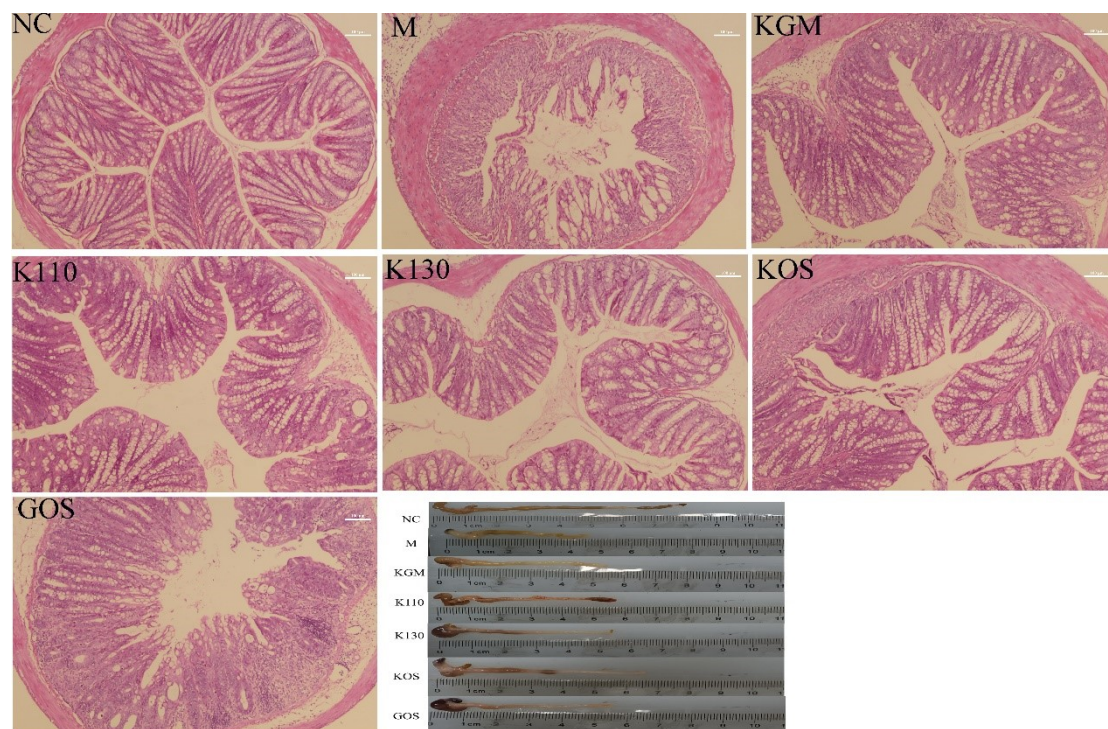

B

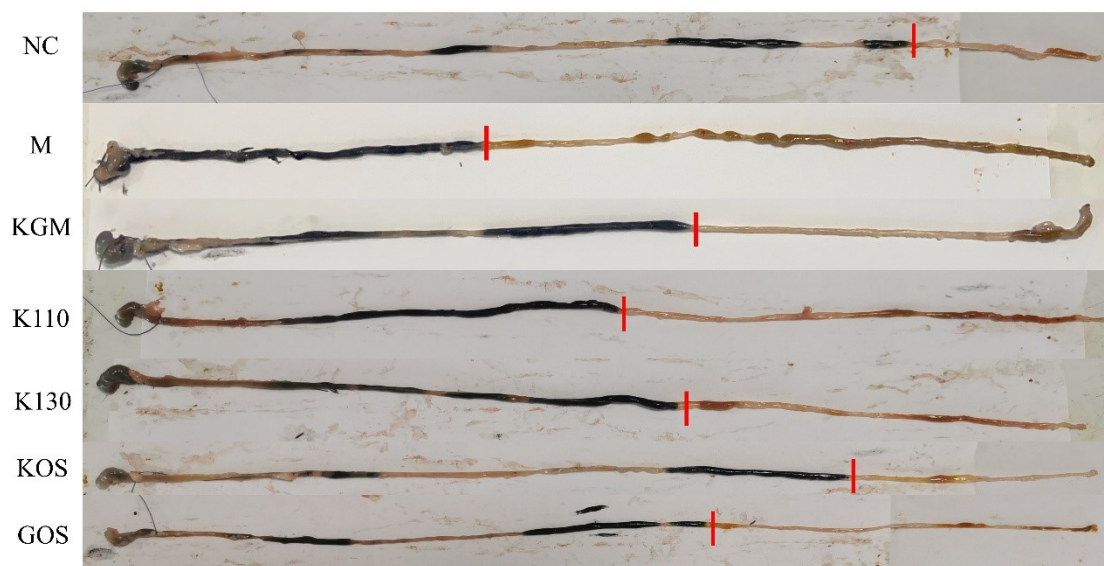

C

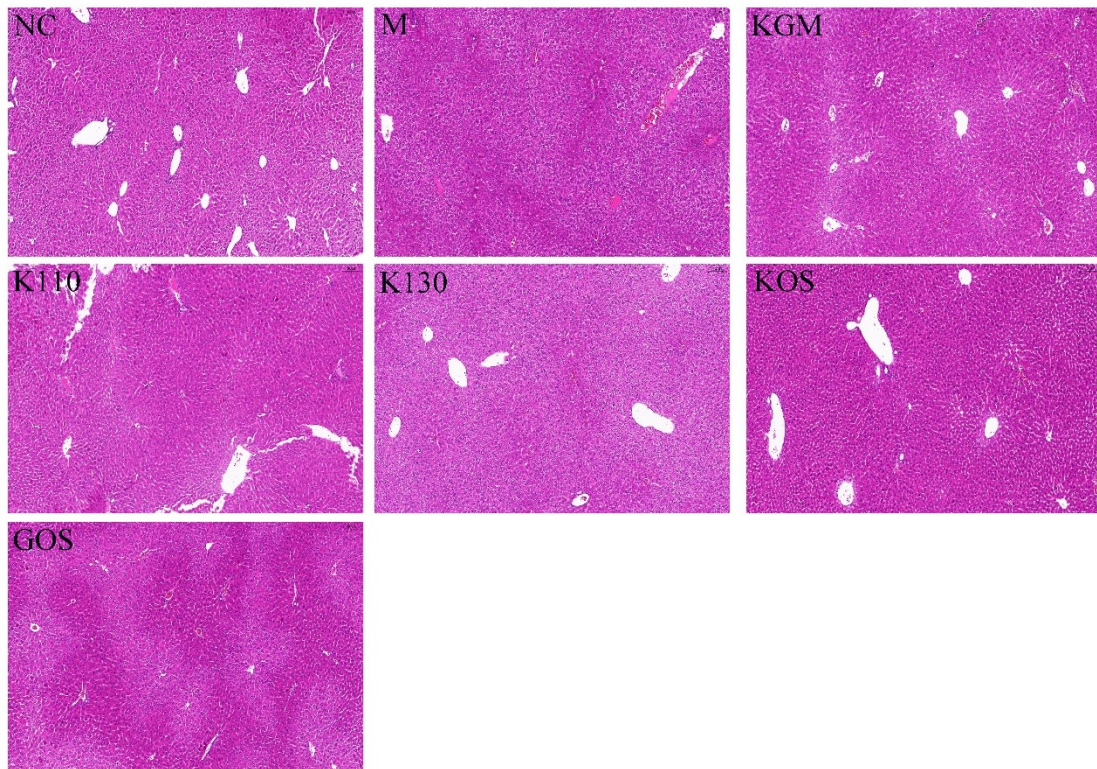

D

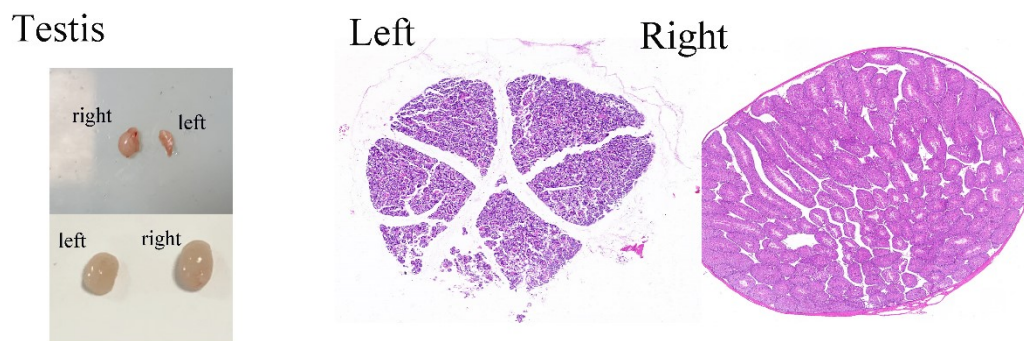

Figure S1 Paraffin sections and morphology of colon (A), small intestine (B) and liver (C), and testis (D) in each group.

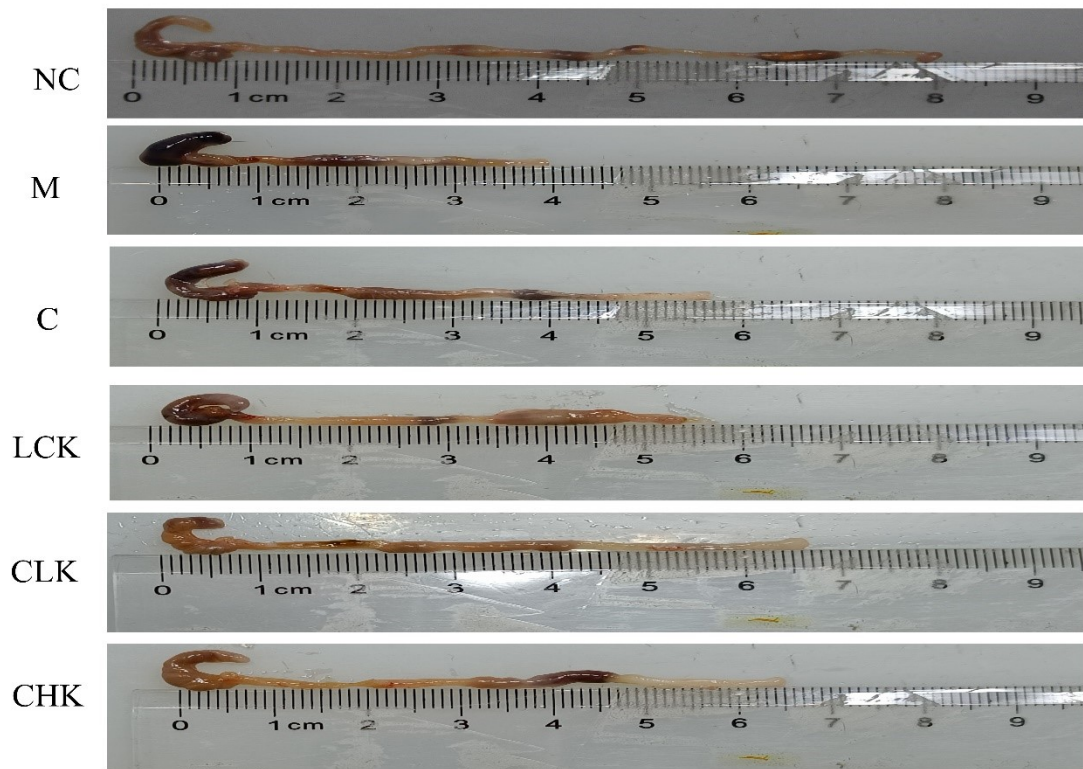

Figure S2 The morphology of colon in each group.

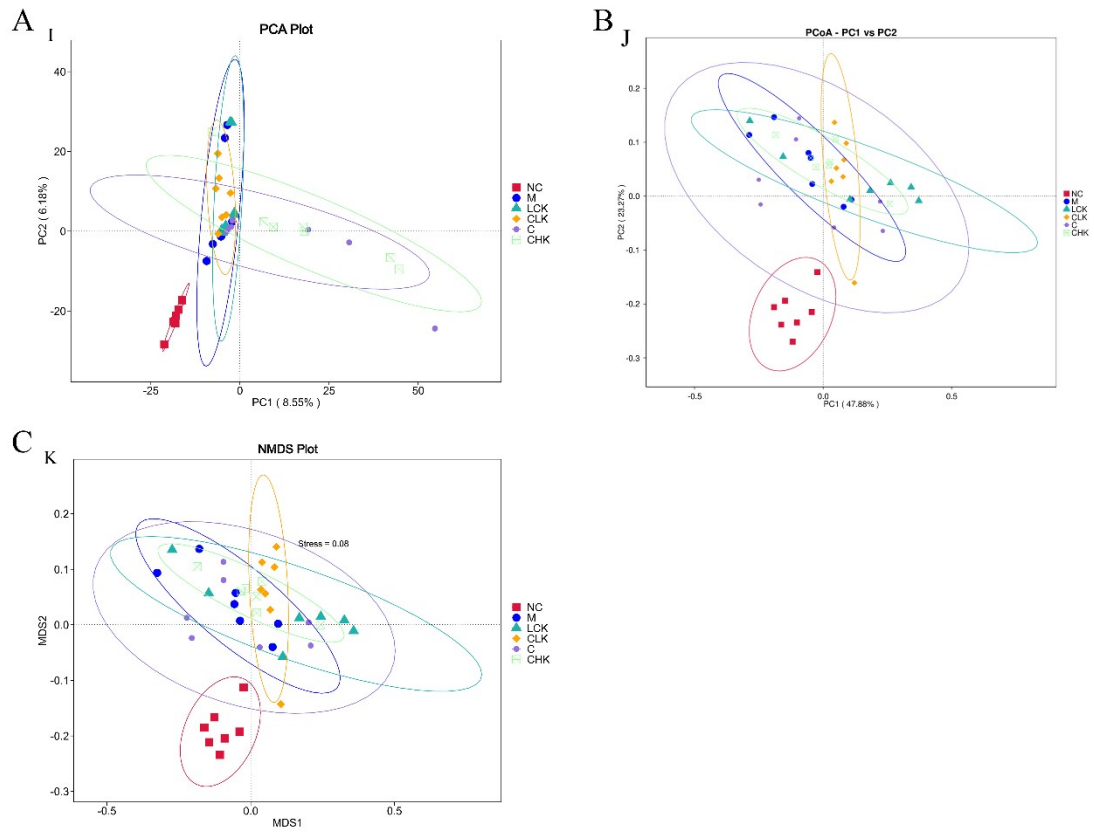

Figure S3  $\beta$ -diversity analyzed by PCA (A), PCoA (B), NMDS (C).

Supplementary Table S1. Mice primer sequences in RT- PCR assays.

| <b>Genes</b>     | <b>Forward</b>            | <b>Reverse</b>            |
|------------------|---------------------------|---------------------------|
| m $\beta$ -Actin | TGGAATCCTGTGGCATCCATGAAAC | TAAAACGCAGCTCAGTAACAGTCCG |
| mTNF- $\alpha$   | TGGGAGTAGACAAGGTACAACCC   | CATCTTCTCAAATTCGAGTGACAA  |
| mIL-1 $\beta$    | CTCGCAGCAGCACATCAACAAG    | GGAAGGTCCACGGGAAAGACAC    |
| mIL-6            | ACCACGGCCTTCCCTACTT       | CACAACCTCTTTTCTCATTTCCAC  |
| mIL-10           | CCCTTTGCTATGGTGTCTT       | TGGTTTCTCTTCCCAAGACC      |
| mZO-1            | CGGAACTATGACCATCGCCTAC    | CTTCGGGATGTTGTCTGGAGTC    |
| mClaudin-1       | AGCTGTGCATGGCCTCTTGT      | CCAATGTCAATGGCAACACCCT    |
| mOccludin        | CAGCCTCGGTACAGCAGCAAT     | ATAGTGGTCAGGGTCCGTCCTC    |
| mMUC1            | AATGGCTCCTCGGTGCTACCTA    | TGACTTGGCACTGAAGGCTGAG    |
| mMUC2            | TGCTGACGAGTGGTTGGTGAATG   | GATGAGGTGGCAGACAGGAGACA   |
